# Supplementary figures and images for: Complete Chloroplast Genome Structural Characterization and Comparative Analysis of Viburnum japonicum (Adoxaceae)
Source: MDPI journal article supplement (doi:10.3390/f14091819), 2023-09-06

# Trans-splicing Genes

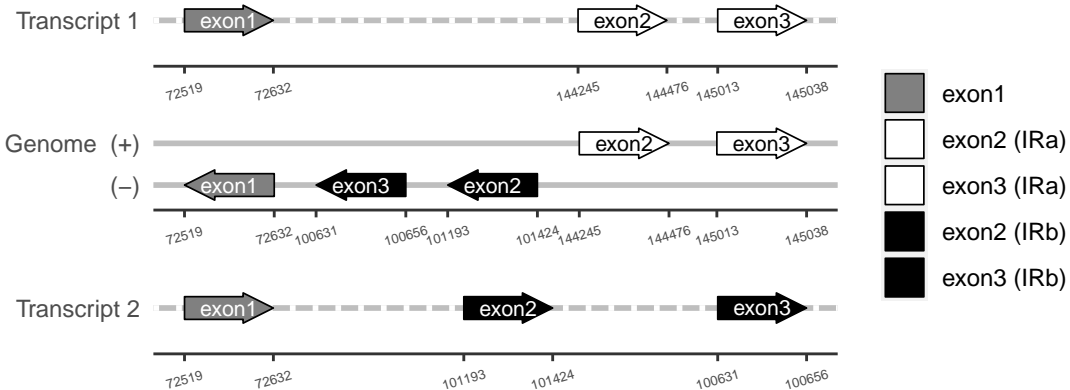

Supplement: s1 [file s1]

# Cis-splicing Genes

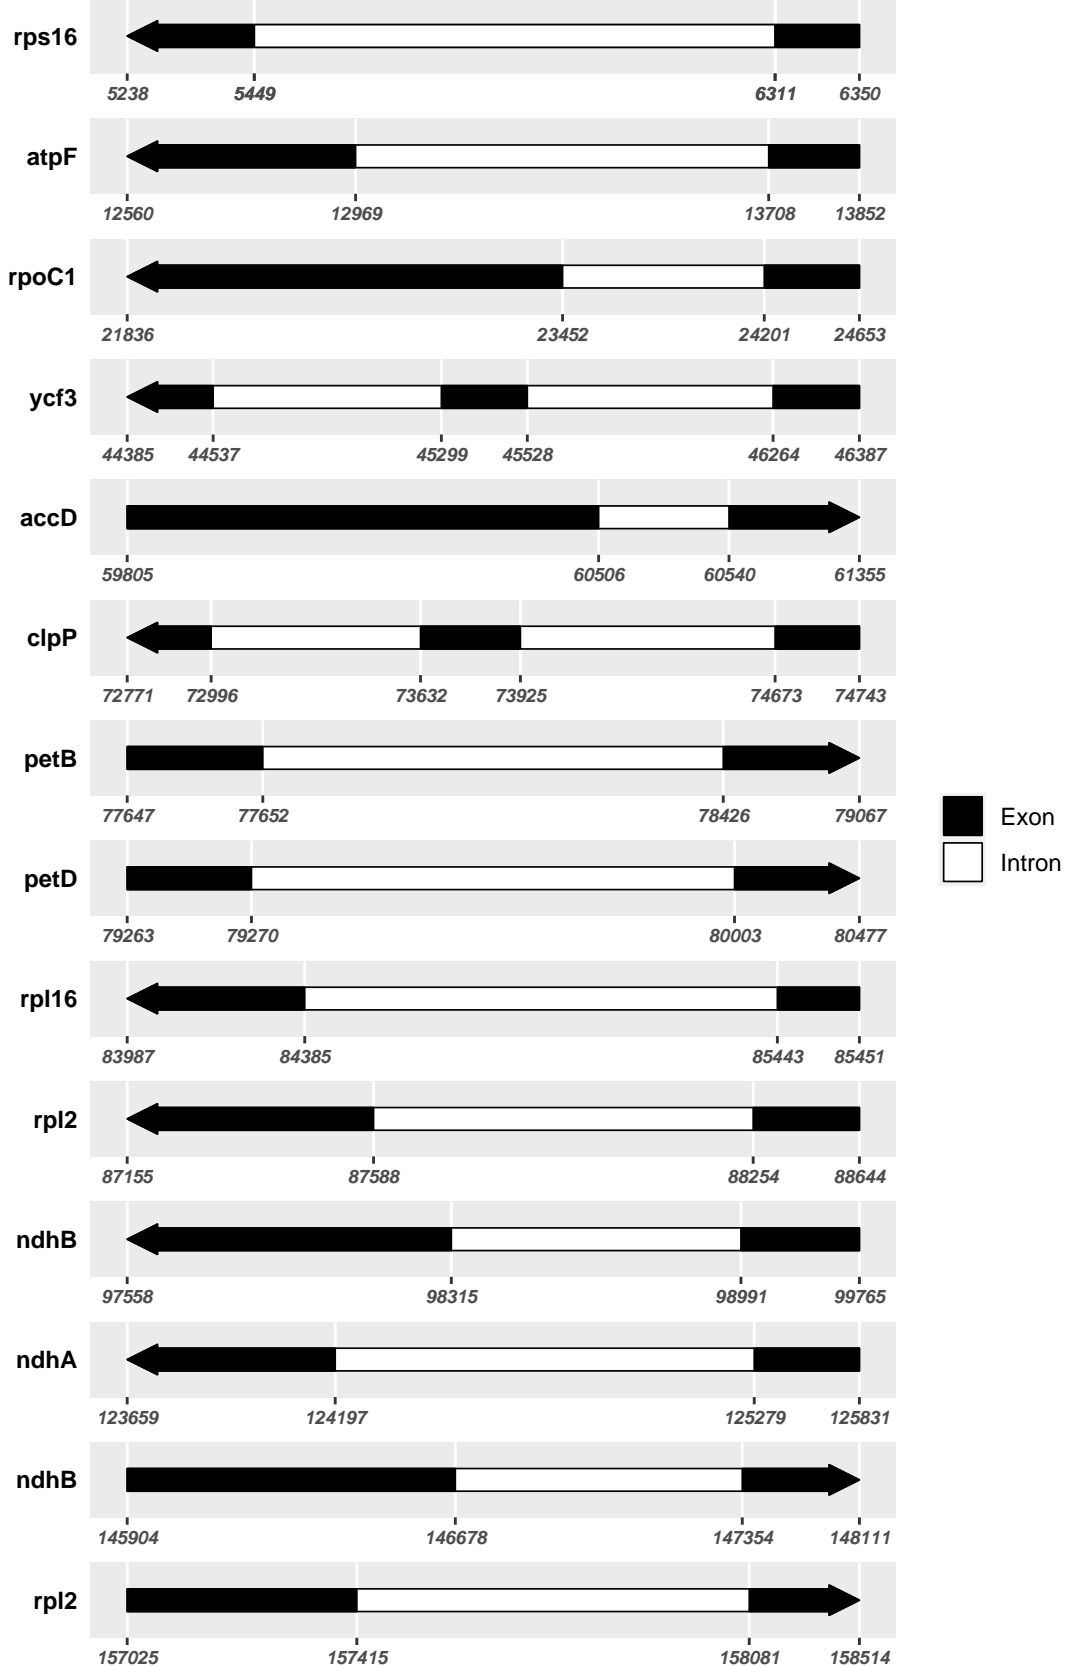

Supplement: s1 [file s1]

JM

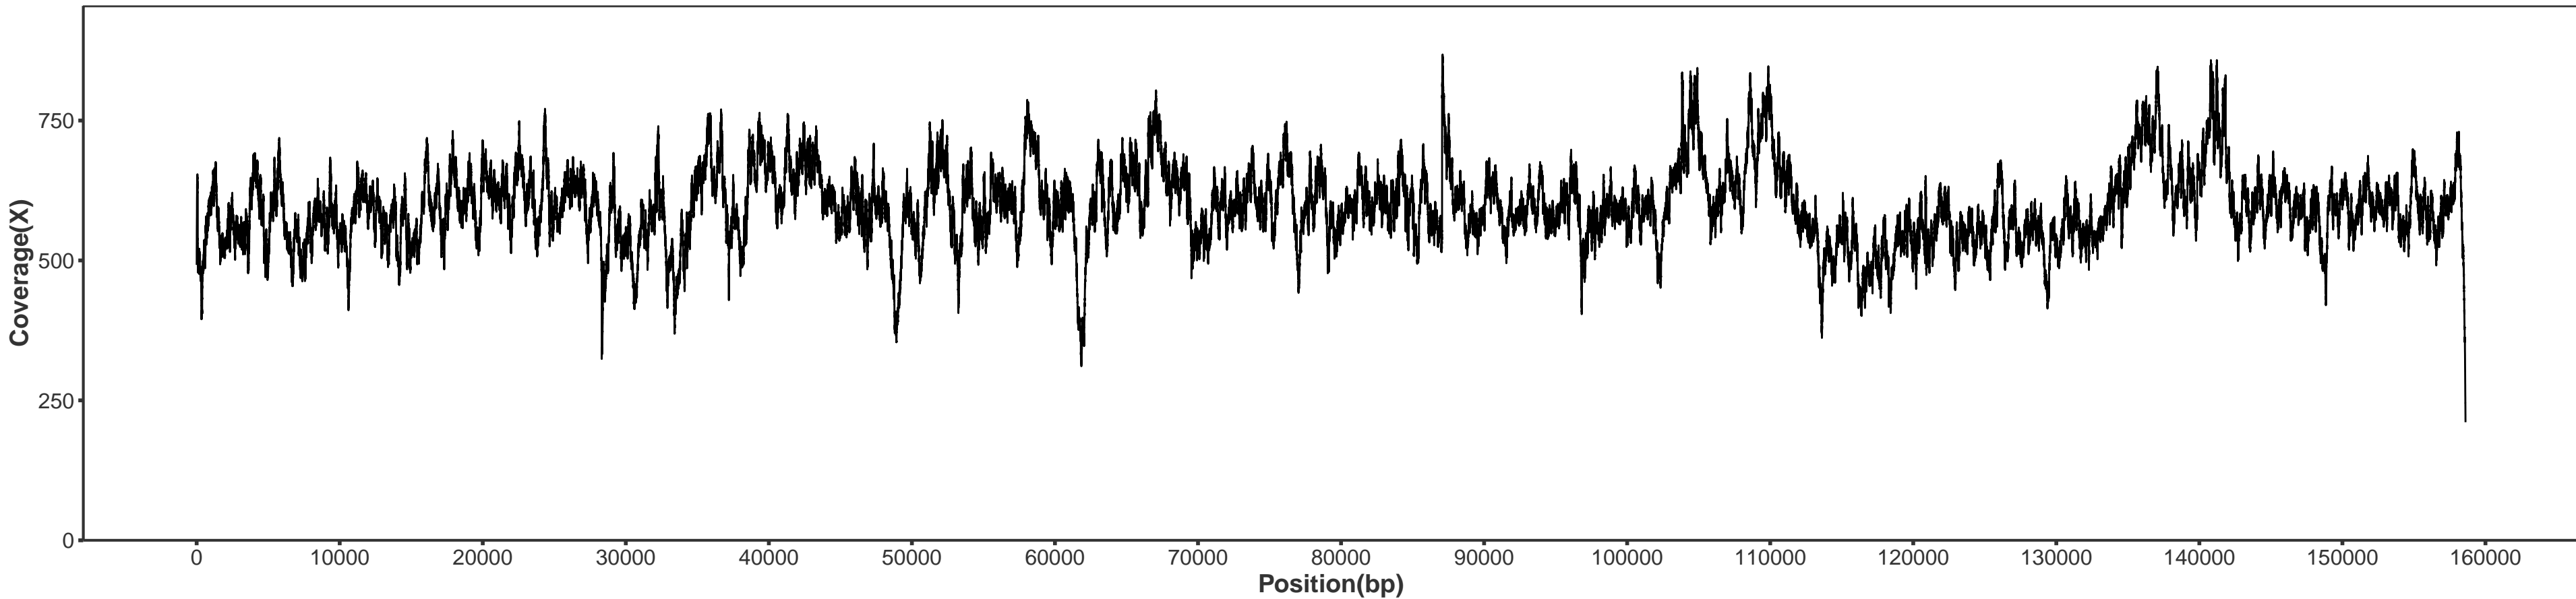

Supplement: s1 [file s1]
